# Supplementary material for: Does tea intake increase the risk of anemia? Evidence from a large prospective cohort and Mendelian randomization study
Source: Royal Society of Chemistry journal article supplement (doi:10.1039/d4fo03324h), 2024-01-01
Supplement: d4fo03324h1.pdf [file d4fo03324h1.pdf]

|                                                                                                                                                                                                               |    |
|---------------------------------------------------------------------------------------------------------------------------------------------------------------------------------------------------------------|----|
| Supplementary Methods .....                                                                                                                                                                                   | 2  |
| Table S1. Summary information for studies about the associations of tea intake with anemia (from Mar 1995 to Aug 2023). .....                                                                                 | 3  |
| Table S2. The characteristics relevant to tea intake on the questionnaire of GBCS at baseline (2003–2008). .....                                                                                              | 9  |
| Table S3. The details of data source in Mendelian randomization.....                                                                                                                                          | 10 |
| Table S4. Baseline characteristics by participants who with (N = 17,898) and without re-assessments (12,187) during the first follow-up (2008–2012).....                                                      | 12 |
| Table S5. Baseline characteristics by participants who with (N = 10,241) and without re-assessments (7,657) during the second follow-up (2013–2019). .....                                                    | 14 |
| Table S6. Baseline characteristics by participants who with (N = 5,303) and without re-assessments (5,132) during the third follow-up (2016–2019). .....                                                      | 16 |
| Table S7. The detailed information on the tea intake instrumental variables used in the two-sample Mendelian randomization. ....                                                                              | 18 |
| Table S8. Detailed information on the instrumental variables for green tea intake and herbal tea intake used in the two-sample Mendelian randomization. ....                                                  | 20 |
| Table S9. Detailed information on the instrumental variables for tea consumption in East Asians used in the two-sample Mendelian randomization.....                                                           | 22 |
| Table S10. Mendelian randomization associations of tea intake with anemia, hemoglobin, and hematocrit after excluding potential pleiotropic SNPs. ....                                                        | 23 |
| Table S11. Mendelian randomization associations of green tea intake and herbal tea intake with anemia, hemoglobin, and hematocrit. ....                                                                       | 25 |
| Table S12. Mendelian randomization associations of tea intake with iron deficiency anemia, hemoglobin, and hematocrit in East Asians.....                                                                     | 27 |
| Figure S1. Flow chart of GBCS participants. ....                                                                                                                                                              | 28 |
| Figure S2. Flow chart about how to select instrumental variables associated with tea intake in main analysis.....                                                                                             | 29 |
| Figure S3. Flow chart about how to select instrumental variables associated with tea intake in sensitive analysis.....                                                                                        | 30 |
| Figure S4: Meta-analysis of inverse-variance weighted results for hemoglobin and hematocrit as outcomes in the main analysis (A) and sensitive analysis after excluding potential pleiotropic SNPs (B). ..... | 31 |

## **Supplementary Methods**

### **Assessment of assumptions**

Mendelian randomization (MR) analysis requires meeting strict assumptions: strong relevance, independence, and exclusivity.<sup>1</sup> We set genome-wide significance at  $P < 5 \times 10^{-8}$ , and we calculated individual instrument F-statistic to avoid a violation of strong relevance. Our samples were sourced from individuals of European ancestry, which largely satisfied the independence assumption to avoid population stratification. Concerning the exclusivity assumption, we used MR-Egger to detect directional pleiotropy. Sensitive analysis was also conducted to exclude SNPs with potential pleiotropy.

### **Sensitivity analysis of Mendelian randomization**

In order to obtain reliable assessment of association, we also utilized different methods: 1) The weighted median method (WM) can provide robust assessment, as long as a minimum of 50% of the information is from valid instruments.<sup>2</sup> 2) The MR-Egger can provide unbiased results, even in the presence of pleiotropy.<sup>3</sup> The intercept of MR-Egger helps to detect pleiotropy, with significance at  $P < 0.05$  indicates its existence. 3) MR pleiotropy residual sum and outlier (MRPRESSO) can identify pleiotropy and outliers. We calculated the empirical P for the MRPRESSO global test via 5,000 simulations, and corrected estimates were used if outliers were identified.<sup>4</sup> Additional searches were performed on Phenoscanner to exclude SNPs displaying pleiotropy<sup>5</sup>. Subsequent reanalysis was conducted to assess the reliability of results as another sensitivity analysis.

**Table S1. Summary information for studies about the associations of tea intake with anemia (from Mar 1995 to Aug 2023).**

| Author (year)                             | Study type                  | Including papers                                | Tea intake assessment                                                                                                      | Anemia assessment                                                                                             | Main results                                                                                                                                                                                                                   | Factors controlled for in the analysis |
|-------------------------------------------|-----------------------------|-------------------------------------------------|----------------------------------------------------------------------------------------------------------------------------|---------------------------------------------------------------------------------------------------------------|--------------------------------------------------------------------------------------------------------------------------------------------------------------------------------------------------------------------------------|----------------------------------------|
| 1 Jing Zhang <sup>6</sup> (2022)          | Meta-analysis               | 9 studies reviewed (inception to June 27, 2022) | Tea/coffee after meals                                                                                                     | Hemoglobin (Hgb) ≤ 11 g/dL                                                                                    | The results showed that tea/coffee after meals was a risk factor for anemia in pregnancy.                                                                                                                                      | /                                      |
| 2 M. Nelson <sup>7</sup> (2004)           | Review                      | 35 studies (published 1980–2002)                | /                                                                                                                          | Iron absorption and iron status                                                                               | From the available evidence there is no need to advise any restriction on tea drinking in healthy people with no risk of iron deficiency.                                                                                      | /                                      |
| 3 EHM Temme <sup>8</sup> (2002)           |                             | 16 studies reviewed (published 1980–2001)       | Tea consumption was calculated as mL/day, cups/day, times/week, g/day                                                      | Iron status                                                                                                   | This overview shows that tea consumption does not influence iron status in Western populations in which most people have adequate iron stores as determined by serum ferritin concentrations.                                  | /                                      |
| 4 EJ Gardner <sup>9</sup> (2007)          |                             | Combined previous two reviews 2 and 3           | Black tea consumption                                                                                                      | Iron status                                                                                                   | There was no evidence that iron status could be harmed by tea drinking unless populations were already at risk from anemia.                                                                                                    | /                                      |
| <b>Populations</b>                        |                             |                                                 |                                                                                                                            |                                                                                                               |                                                                                                                                                                                                                                |                                        |
| 5 Kenneth J Mukamal <sup>10</sup> (2007)  | Randomized controlled trial | Israel, 31 adults aged 55 years and older       | Participants were randomized to drink 3 glasses daily of either a standardized black tea preparation or water for 6 months | Hemoglobin was measured at the beginning and conclusion of the study                                          | They did not find major changes in hemoglobin levels through the trial (P = 0.59).                                                                                                                                             | /                                      |
| 6 Salma F Ahmad Fuzi <sup>11</sup> (2017) | Controlled trial            | UK, 12 premenopausal women aged 19–40 years     | The test meal (TM) was administered with water (TM-1), with tea administered simultaneously (TM-2), and with tea           | The effect of tea consumption on nonheme iron absorption with the use of <sup>57</sup> Fe as a stable isotope | There were also no changes observed in subjects' hemoglobin between baseline and postintervention. Despite the lower plasma ferritin concentration postintervention, it was within the range of replete iron stores (15 mg/L). | /                                      |

|    |                                            |                       |                                                                   |                                                                                                                                             |                                                                                                         |                                                                                                                                                                                                                                                                                                                        |                                                                                                                                           |
|----|--------------------------------------------|-----------------------|-------------------------------------------------------------------|---------------------------------------------------------------------------------------------------------------------------------------------|---------------------------------------------------------------------------------------------------------|------------------------------------------------------------------------------------------------------------------------------------------------------------------------------------------------------------------------------------------------------------------------------------------------------------------------|-------------------------------------------------------------------------------------------------------------------------------------------|
| 7  | E. TYMPA-PSIRROPOULOU <sup>12</sup> (2005) | Case-control study    | Greece, 938 children aged 12–24 months                            | administered 1 h postmeal (TM-3)<br>A specific questionnaire concerning tea drinking frequency: every day every 2–3 weeks every week rarely | World Health Organization (WHO) as a diagnostic limit of anemia                                         | The cases were breastfed less, were drinking fresh cow's milk and tea, were eating meat, vegetables and fruit less often, had a bad appetite and were more likely to get sick.                                                                                                                                         | /                                                                                                                                         |
| 8  | Melese Sinaga Teshome <sup>13</sup> (2020) |                       | Ethiopia, 344 pregnant women                                      | Tea/coffee consumption (yes/no)                                                                                                             | WHO cut off point                                                                                       | The probabilities of developing anemia among pregnant women's who were drinking tea/coffee instantly after food were 3.6 times more likely to develop anemia as compared to than those mothers who did not drink tea/coffee (AOR = 3.6; 95% CI: 1.72–7.42).                                                            | Age of mother, residence, menstrual blood flow rate, food taboo, tea/coffee consumption, Dietary Diversity Score (DDS), stool examination |
| 9  | K Imai <sup>14</sup> (1995)                | Cross-sectional study | Yoshimi, Japan, 1371 men aged over 40 years                       | Information on consumption of green tea (categorized as ≤ 3, 4–9, or ≥10 cups a day) from the questionnaire                                 | Hemoglobin (g/L)                                                                                        | The proportion of subjects with abnormally low hemoglobin concentrations (< 120 g/L) was not related, however, to consumption of green tea.                                                                                                                                                                            | Age, cigarette smoking, and alcohol consumption                                                                                           |
| 10 | L Mennen <sup>15</sup> (2007)              |                       | French, 954 men aged 52–68 years, and 1639 women aged 42–68 years | Three 1-day food records were used to estimate the intake of other dietary enhancing or inhibiting factors of iron absorption               | Serum-ferritin was measured, and iron depletion was defined as a serum ferritin concentration < 16 µg/L | The mean serum-ferritin concentration was not related to black, green and herbal tea consumption in men, pre- or postmenopausal women. Also the risk of iron depletion was in the multivariate model not related to any kind of tea drinking or to the strength of tea, the infusion time or the time of tea drinking. | Age, smoking and intakes of coffee, iron, calcium, animal protein and vitamin C                                                           |
| 11 | P S Hogenkamp <sup>16</sup> (2008)         |                       | South Africa, 1,605 adults aged                                   | FFQ was used to collect information on dietary                                                                                              | Hgb and serum ferritin                                                                                  | Logistic regression showed that tea consumption did not significantly increase risk for iron deficiency (men: OR: 1.36;                                                                                                                                                                                                | Age, BMI, smoking status, and alcohol and iron intake                                                                                     |

|    |                                        |                                                 |                                                                                                                                |                                                                                              |                                                                                                                                                                                   |                                                                                                                                                                              |
|----|----------------------------------------|-------------------------------------------------|--------------------------------------------------------------------------------------------------------------------------------|----------------------------------------------------------------------------------------------|-----------------------------------------------------------------------------------------------------------------------------------------------------------------------------------|------------------------------------------------------------------------------------------------------------------------------------------------------------------------------|
|    |                                        | 15–65 years                                     | intake                                                                                                                         | concentrations                                                                               | 95% CI: 0.99, 1.87; women: OR: 0.98; 95% CI: 0.84, 1.13) nor for iron deficiency anemia (men: OR: 1.28; 95% CI: 0.84, 1.96; women: OR: 0.93; 95% CI: 0.78, 1.11).                 |                                                                                                                                                                              |
| 12 | Naila Baig-Ansari <sup>17</sup> (2008) | Pakistan, 1,369 pregnant women                  | A 24-hour dietary recall                                                                                                       | Anemia was classified according to the WHO classification for pregnant women.                | Tea consumption before pregnancy (adjusted prevalence odds ratio (APOR) = 3.2, 95% CI: 1.3 to 8.0) was associated with anemia.                                                    | Education, pregnancy history, and height                                                                                                                                     |
| 13 | Ilse Pynaert <sup>18</sup> (2009)      | Belgium, 788 women aged 18–39 years             | Nutritional variables were assessed using a 2d food record and non-nutritional variables by a general questionnaire            | Fe status parameters were determined on a fasting venous blood sample.                       | The tea intake was negatively associated with serum ferritin (P = 0.007).                                                                                                         | Contraceptive use, time since last blood donation, time since last pregnancy                                                                                                 |
| 14 | Eun Suk Sung <sup>19</sup> (2018)      | Korean, 27,071 adults aged 19 years and over    | Food frequency questionnaire (FFQ) or 24-hour dietary                                                                          | Serum ferritin level (by an immunoradiometric assay using a 1,470 Wizard Gamma Counter)      | Green tea intake was not related to serum ferritin levels.                                                                                                                        | Age, body mass index (BMI), education level, smoking status, alcohol consumption, physical activity, hypertension, diabetes mellitus, and calorie-adjusted daily iron intake |
| 15 | Dyness Kejo <sup>20</sup> (2018)       | Arusha, Tanzania, 436 children aged 6–59 months | Standard questionnaire at baseline during face-to-face interviews with the parents/guardians (tea with sugar: drink/not drink) | Anemia cut-off points were defined according to WHO standards for children aged 6-59 months. | Ultivariable logistic regression identified the following predictors of anemia: drinking tea (AOR: 4.5, 95% CI: 1.5–13.7).                                                        | Gender, age                                                                                                                                                                  |
| 16 | Nyasiro S Gibore <sup>21</sup> (2021)  | Tanzania, 338 pregnant women                    | consuming excess tea (yes/no)                                                                                                  | WHO cut off point                                                                            | Pregnant women who were not drinking tea or coffee with meals were less likely to be anemic than those who consumed tea or coffee with meals (AOR = 0.06; 95% CI = 0.03–0.13, P < | Parity, gravidity, birth interval, higher education level and multigravida                                                                                                   |

0.001).

|    |                                         |                                                                                     |                                                                                                                                                                                                                                         |                                                                                                                            |                                                                                                                                                                                                                                                                                                                                                                                                                                                                                                                     |                                                                                                                                                                                                                             |
|----|-----------------------------------------|-------------------------------------------------------------------------------------|-----------------------------------------------------------------------------------------------------------------------------------------------------------------------------------------------------------------------------------------|----------------------------------------------------------------------------------------------------------------------------|---------------------------------------------------------------------------------------------------------------------------------------------------------------------------------------------------------------------------------------------------------------------------------------------------------------------------------------------------------------------------------------------------------------------------------------------------------------------------------------------------------------------|-----------------------------------------------------------------------------------------------------------------------------------------------------------------------------------------------------------------------------|
| 17 | Kashish Grover<br>22 (2020)             | Haryana, India,<br>408 pregnant<br>women                                            | A semi-structured,<br>predesigned, pretested,<br>interviewer-administered<br>questionnaire                                                                                                                                              | Anemia was defined<br>as a hemoglobin<br>concentration < 11<br>g/dL.                                                       | The association of tea consumption was statistically significant<br>with the severity of anemia (P < 0.05).                                                                                                                                                                                                                                                                                                                                                                                                         | /                                                                                                                                                                                                                           |
| 18 | MAHA<br>AWADH<br>ALRESHIDI 23<br>(2021) | Hailcity, Saudi<br>Arabia<br>390 pregnant<br>women                                  | FFQ format with four<br>options in the category<br>for frequency of intake                                                                                                                                                              | The hemoglobin<br>level of < 11 g/dL<br>was considered as<br>anemia.                                                       | The habit of drinking tea just after meals was found to be<br>significantly associated with anemia (AOR = 1.91, 95% CI: 1.2–<br>13.03, P = 0.019).                                                                                                                                                                                                                                                                                                                                                                  | Sociodemographic factors; dietary and<br>nutrition factors; obstetric and menstrual<br>factors; and medical factors                                                                                                         |
| 19 | Dagyeong Lee<br>24 (2023)               | Korea, 4322<br>premenopausal<br>women who were<br>not pregnant or<br>nursing a baby | 11 consumption<br>frequency categories in<br>the FFQ of the fifth<br>KNHANES (2010–<br>2011)                                                                                                                                            | Serum hemoglobin<br>level (g/dL) and<br>ferritin levels<br>(ng/mL)                                                         | No significant association was observed between green tea<br>intake and the biochemical markers of iron status.                                                                                                                                                                                                                                                                                                                                                                                                     | Adjusted for BMI, education, alcohol<br>consumption, current smoking,<br>hypertension, diabetes mellitus, physical<br>activity, total energy intake, and daily<br>iron intake                                               |
| 20 | Hinako Nanri 25<br>(2023)               | Saga, Japan,<br>4,263 men and<br>6,172 women<br>aged 40–69 years                    | Validated Japanese FFQ,<br>the frequencies of green<br>tea consumption were as<br>follows: almost none, 1–<br>3 times/month, 1–2<br>times/week, 3–4<br>times/week, 5–6<br>times/week, 1 time/day,<br>2 times/day, and ≥ 3<br>times/day. | Serum ferritin<br>concentrations, and<br>iron deficiency was<br>defined as a serum<br>ferritin concentration<br>< 12 µg/L. | They observed that higher green tea and coffee consumption<br>was associated with lower ferritin levels in men and<br>postmenopausal women, even<br>after adjusting for covariates (all P for trends < 0.05). Among<br>premenopausal women, they found an inverse association<br>between green tea consumption and serum ferritin levels, while<br>no significant association was observed for coffee<br>consumption after adjusting for covariates (green tea, P for trend<br>< 0.05; coffee, P for trend = 0.08). | Adjusted for age, BMI, total energy<br>intake, alcohol consumption, smoking,<br>physical activity level, iron intake,<br>vitamin C intake, and coffee or green tea<br>consumption, dietary iron intake,<br>vitamin C intake |

## References

1. V. W. Skrivankova, R. C. Richmond, B. A. R. Woolf, J. Yarmolinsky, N. M. Davies, S. A. Swanson, T. J. VanderWeele, J. P. T. Higgins, N. J. Timpson, N. Dimou, C. Langenberg, R. M. Golub, E. W. Loder, V. Gallo, A. Tybjaerg-Hansen, G. Davey Smith, M. Egger and J. B. Richards, Strengthening the Reporting of Observational Studies in Epidemiology Using Mendelian Randomization: The STROBE-MR Statement, *JAMA*, 2021, **326**, 1614.
2. J. Bowden, G. Davey Smith, P. C. Haycock and S. Burgess, Consistent Estimation in Mendelian Randomization with Some Invalid Instruments Using a Weighted Median Estimator, *Genet. Epidemiol.*, 2016, **40**, 304-314.
3. S. Burgess, J. Bowden, T. Fall, E. Ingelsson and S. G. Thompson, Sensitivity Analyses for Robust Causal Inference from Mendelian Randomization Analyses with Multiple Genetic Variants, *Epidemiology (Cambridge, Mass.)*, 2017, **28**, 30-42.
4. M. Verbanck, C.-Y. Chen, B. Neale and R. Do, Detection of widespread horizontal pleiotropy in causal relationships inferred from Mendelian randomization between complex traits and diseases, *Nat. Genet.*, 2018, **50**, 693-698.
5. M. A. Kamat, J. A. Blackshaw, R. Young, P. Surendran, S. Burgess, J. Danesh, A. S. Butterworth and J. R. Staley, PhenoScanner V2: an expanded tool for searching human genotype-phenotype associations, *Bioinformatics (Oxford, England)*, 2019, **35**, 4851-4853.
6. J. Zhang, Q. Li, Y. Song, L. Fang, L. Huang and Y. Sun, Nutritional factors for anemia in pregnancy: A systematic review with meta-analysis, *Front. Public Health*, 2022, **10**, 1041136.
7. M. Nelson and J. Poulter, Impact of tea drinking on iron status in the UK: a review, *J. Hum. Nutr. Diet.*, 2004, **17**, 43-54.
8. E. H. M. Temme and P. G. A. Van Hoydonck, Tea consumption and iron status, *Eur. J. Clin. Nutr.*, 2002, **56**, 379-386.
9. E. J. Gardner, C. H. S. Ruxton and A. R. Leeds, Black tea--helpful or harmful? A review of the evidence, *Eur. J. Clin. Nutr.*, 2007, **61**, 3-18.
10. K. J. Mukamal, K. MacDermott, J. A. Vinson, N. Oyama, W. J. Manning and M. A. Mittleman, A 6-month randomized pilot study of black tea and cardiovascular risk factors, *Am. Heart J.*, 2007, **154**, 724.e721-726.
11. S. F. Ahmad Fuzi, D. Koller, S. Bruggraber, D. I. Pereira, J. R. Dainty and S. Mushtaq, A 1-h time interval between a meal containing iron and consumption of tea attenuates the inhibitory effects on iron absorption: a controlled trial in a cohort of healthy UK women using a stable iron isotope, *Am J Clin Nutr*, 2017, **106**, 1413-1421.
12. E. Tympa-Psirropoulou, C. Vagenas, D. Psirropoulos, O. Dafni, A. Matala and F. Skopouli, Nutritional risk factors for iron-deficiency anaemia in children 12-24 months old in the area of Thessalia in Greece, *Int. J. Food Sci. Nutr.*, 2005, **56**, 1-12.
13. M. S. Teshome, D. H. Meskel and B. Wondafrash, Determinants of Anemia Among Pregnant Women Attending Antenatal Care Clinic at Public Health Facilities in Kacha Birra District, Southern Ethiopia, *J Multidiscip Healthc*, 2020, **13**, 1007-1015.
14. K. Imai and K. Nakachi, Cross sectional study of effects of drinking green tea on cardiovascular and liver diseases, *BMJ (Clinical research ed.)*, 1995, **310**, 693-696.
15. L. Mennen, T. Hirvonen, N. Arnault, S. Bertrais, P. Galan and S. Hercberg, Consumption of black, green and herbal tea and iron status in French adults, *Eur. J. Clin. Nutr.*, 2007, **61**, 1174-1179.

16. P. S. Hogenkamp, J. C. Jerling, T. Hoekstra, A. Melse-Boonstra and U. E. MacIntyre, Association between consumption of black tea and iron status in adult Africans in the North West Province: the THUSA study, *Br J Nutr*, 2008, **100**, 430-437.
17. N. Baig-Ansari, S. H. Badruddin, R. Karmaliani, H. Harris, I. Jehan, O. Pasha, N. Moss, E. M. McClure and R. L. Goldenberg, Anemia prevalence and risk factors in pregnant women in an urban area of Pakistan, *Food Nutr. Bull.*, 2008, **29**, 132-139.
18. I. Pynaert, D. De Bacquer, C. Matthys, J. Delanghe, M. Temmerman, G. De Backer and S. De Henauw, Determinants of ferritin and soluble transferrin receptors as iron status parameters in young adult women, *Public Health Nutr*, 2009, **12**, 1775-1782.
19. E. S. Sung, C. K. Choi, N. R. Kim, S. A. Kim and M.-H. Shin, Association of Coffee and Tea with Ferritin: Data from the Korean National Health and Nutrition Examination Survey (IV and V), *Chonnam Med. J.*, 2018, **54**, 178-183.
20. D. Kejo, P. M. Petrucka, H. Martin, M. E. Kimanya and T. C. Mosha, Prevalence and predictors of anemia among children under 5 years of age in Arusha District, Tanzania, *Pediatric Health Med Ther*, 2018, **9**, 9-15.
21. N. S. Gibore, A. F. Ngowi, M. J. Munyogwa and M. M. Ali, Dietary Habits Associated with Anemia in Pregnant Women Attending Antenatal Care Services, *Curr. Dev. Nutr.*, 2021, **5**, nzaa178.
22. K. Grover, T. Kumar, A. Doda, R. Bhutani, S. Yadav, P. Kaushal, R. Kapoor and S. Sharma, Prevalence of anaemia and its association with dietary habits among pregnant women in the urban area of Haryana, *Journal of Family Medicine and Primary Care*, 2020, **9**, 783-787.
23. M. A. ALRESHIDI and H. K. HARIDI, Prevalence of anemia and associated risk factors among pregnant women in an urban community at the North of Saudi Arabia, *J. Prev. Med. Hyg.*, 2021, **62**, E653-E663.
24. D. Lee, W. Jung and D. W. Shin, Association of Coffee or Green Tea with Ferritin or Hemoglobin in Premenopausal Women, *Korean J. Fam. Med.*, 2023, **44**, 87-94.
25. H. Nanri, M. Hara, Y. Nishida, C. Shimanoe, C. Iwasaka, Y. Higaki and K. Tanaka, Association between green tea and coffee consumption and body iron storage in Japanese men and women: a cross-sectional study from the J-MICC Study Saga, *Front. Nutr.*, 2023, **10**, 1249702.



**Table S2. The characteristics relevant to tea intake on the questionnaire of GBCS at baseline (2003–2008).**

| <b>Items</b>                          | <b>Questions</b>                                                                                                                                                                             | <b>Answers</b>                                                                                                                                                                                                                                                        |
|---------------------------------------|----------------------------------------------------------------------------------------------------------------------------------------------------------------------------------------------|-----------------------------------------------------------------------------------------------------------------------------------------------------------------------------------------------------------------------------------------------------------------------|
| Tea intake                            | Which of the following situations best reflects your tea-drinking habits in the past year?                                                                                                   | "Never or almost never", "occasionally", "used to drink tea regularly, but not anymore" and "currently drink tea regularly (at least once a week)"                                                                                                                    |
| Frequency of tea drinking (days/week) | On average, how many days did you drink tea per week in the past 12 months?                                                                                                                  | "1–2 days per week", "3–4 days per week", "5–6 days per week", "every day or almost every day"                                                                                                                                                                        |
| Amount of tea intake/occasion         | When you drink tea on a given day, how many cups of tea do you typically drink in a day? (Measured in cups with a capacity of 150 mL; please select the type of tea you most commonly drink) | "Green tea/Jasmine tea/Dragon Well/White tea, □□ cups/day",<br>"Oolong tea (Tieguanyin, Narcissus, and others), □□ cups/day",<br>"black tea (include brick tea, Pu-erh), □□ cups/day",<br>"other (please specify, such as herbal tea, and others), _____ □□ cups/day" |
| Tea drinking duration (years)         | At what age did you start habitually drinking tea?                                                                                                                                           | "□□ years old"                                                                                                                                                                                                                                                        |
| Tea concentration                     | What is your preferred tea concentration when you drink tea?                                                                                                                                 | "Mild", "moderate", "strong", "very strong"                                                                                                                                                                                                                           |

GBCS: Guangzhou Biobank Cohort Study.

**Table S3. The details of data source in Mendelian randomization.**

| Type     | Phenotype              | Consortium                      | Definition                                                                                                                                                               | Unit     | GWAS ID/PMID          | Age, years        | Population | Sample size (case/control) |
|----------|------------------------|---------------------------------|--------------------------------------------------------------------------------------------------------------------------------------------------------------------------|----------|-----------------------|-------------------|------------|----------------------------|
| Exposure | Tea intake             | UK Biobank                      | “How many cups of tea do you drink each day (include black and green tea)?”                                                                                              | cups/day | ukb-b-6066            | 40–69             | European   | 447,485                    |
|          | Green tea intake       | UK Biobank                      | “How many cups of green tea did you drink yesterday (0 cups, 1 cup, 2 cups, 3 cups, 4 cups, 5 cups and $\geq 6$ cups).?”                                                 | cups/day | ukb-b-4078            | 40-69             | European   | 64,949                     |
|          | Herbal tea intake      | UK Biobank                      | “How many cups of herbal tea did you drink yesterday (0 cups, 1 cup, 2 cups, 3 cups, 4 cups, 5 cups and $\geq 6$ cups).?”                                                | cups/day | ukb-b-13344           | 40-69             | European   | 64,949                     |
|          | Green tea consumption  | Biobank Japan                   | Participants were asked to determine the frequency of consumption on a four-point scale (1, almost daily; 2, 3–4 days a week; 3, 1–2 days per week; and 4, very rarely). | /        | 31959922              | 20–89             | East Asian | 152,653                    |
| Outcome  | Anemia                 | FinnGen                         | A reduction in the number of circulating erythrocytes or in the quantity of hemoglobin                                                                                   | /        | finngen_R9_D3_ANAEMIA | Median age was 63 | European   | 27,371/88,536              |
|          | Iron deficiency anemia | The China Kadoorie Biobank      | ICD 10 code D50: iron deficiency anemia                                                                                                                                  | /        | 37601966              | 30-79             | East Asian | 128/75,752                 |
|          | Hemoglobin             | INTERVAL, UK Biobank, UK BiLEVE | Hemoglobin                                                                                                                                                               | g/dL     | 27863252              | $\geq 18$         | European   | 172,925                    |
|          | Hematocrit             | INTERVAL, UK Biobank, UK BiLEVE | Hematocrit                                                                                                                                                               | %        | 27863252              | $\geq 18$         | European   | 173,039                    |

|            |                                      |                                                           |      |          |                           |            |        |
|------------|--------------------------------------|-----------------------------------------------------------|------|----------|---------------------------|------------|--------|
| Hemoglobin | The UK Household Longitudinal Study  | Hemoglobin                                                | g/L  | 28887542 | 16–99                     | European   | 9,667  |
| Hematocrit | BioVU                                | Hematocrit (volume fraction) of blood by automated count) | %    | 33441150 | Average median age was 52 | European   | 65,907 |
| Hemoglobin | Korean Genome and Epidemiology Study | Hemoglobin                                                | g/dL | 36777999 | Mean age was 54.15        | East Asian | 70,643 |
| Hematocrit | Korean Genome and Epidemiology Study | Hematocrit                                                | %    | 36777999 | Mean age was 54.15        | East Asian | 54,365 |

---

BioVU: the Vanderbilt University biobank; GWAS: genome-wide association study.

**Table S4. Baseline characteristics by participants who with (N = 17,898) and without re-assessments (12,187) during the first follow-up (2008–2012).**

|                                             | With (N=17,898) | Without (N=12,187) | Cohen's effect size* |
|---------------------------------------------|-----------------|--------------------|----------------------|
| Sex, men, N (%)                             | 4,867 (27.2)    | 3,466 (28.4)       | 0.028                |
| Age, years, mean (SD)                       | 60.7 (6.9)      | 62.8 (7.4)         | 0.290                |
| Self-reported health, good/very good, N (%) | 14,543 (83.3)   | 9,485 (80.6)       | 0.072                |
| Hemoglobin, g/L, mean (SD)                  | 136.5 (13.4)    | 136.4 (13.9)       | 0.011                |
| Hematocrit, %, (SD)                         | 40.5 (4.2)      | 40.4 (3.8)         | 0.019                |
| <b>Socioeconomic position</b>               |                 |                    |                      |
| Education, N (%)                            |                 |                    |                      |
| ≤ Primary                                   | 6,964 (38.9)    | 5,921 (48.6)       | 0.162                |
| Middle school                               | 9,289 (51.9)    | 5,213 (42.8)       |                      |
| ≥ College                                   | 1,641 (9.2)     | 1,046 (8.6)        |                      |
| Occupation, N (%)                           |                 |                    |                      |
| Manual                                      | 10,701 (60.2)   | 7,597 (62.6)       | 0.019                |
| Non-manual                                  | 4,378 (24.6)    | 2,745 (22.6)       |                      |
| Other                                       | 2,713 (15.3)    | 1,797 (14.8)       |                      |
| Family income, CNY/year, N (%)              |                 |                    |                      |
| ≤ 30,000                                    | 6,611 (37.0)    | 4,811 (39.5)       | 0.012                |
| > 30,000                                    | 7,263 (40.6)    | 4,206 (34.6)       |                      |
| Don't know                                  | 4,007 (22.4)    | 3,149 (25.9)       |                      |
| <b>Behavioral factors</b>                   |                 |                    |                      |
| Smoking status, N (%)                       |                 |                    |                      |
| Never                                       | 14,698 (82.2)   | 9,572 (78.6)       | 0.083                |
| Former                                      | 1,512 (8.5)     | 1,248 (10.3)       |                      |
| Current                                     | 1,675 (9.4)     | 1,354 (11.1)       |                      |
| Alcohol use, N (%)                          |                 |                    |                      |
| Never                                       | 12,712 (71.4)   | 8,954 (73.9)       | 0.062                |
| Former                                      | 611 (3.4)       | 451 (3.7)          |                      |
| Current                                     | 4,491 (25.2)    | 2,716 (22.4)       |                      |
| Physical activity, N (%)                    |                 |                    |                      |
| Inactive                                    | 1,447 (8.1)     | 990 (8.1)          | 0.049                |
| Minimally active                            | 7,140 (40.0)    | 5,233 (42.9)       |                      |
| Active                                      | 9,311 (52.0)    | 5,964 (48.9)       |                      |
| Tea intake, N (%)                           |                 |                    |                      |
| Never-drinkers                              | 1,960 (11.0)    | 1,457 (12.0)       | 0.006                |
| Occasional drinkers                         | 5,946 (33.2)    | 3,882 (31.9)       |                      |
| Former drinkers                             | 103 (0.6)       | 114 (0.9)          |                      |
| Regular drinkers                            | 9,889 (55.3)    | 6,734 (55.3)       |                      |

CNY = Chinese Yuan Renminbi (US\$1 = 7 CNY); SD = standard deviation.

\* Cohen classified effect sizes as small ( $d = 0.2$ ), medium ( $d = 0.5$ ), and large ( $d \geq 0.8$ ).

**Table S5. Baseline characteristics by participants who with (N = 10,241) and without re-assessments (7,657) during the second follow-up (2013–2019).**

|                                             | With (N=10,241) | Without (N=7,657) | Cohen's effect size* |
|---------------------------------------------|-----------------|-------------------|----------------------|
| Sex, men, N (%)                             | 2,728 (26.6)    | 2,139 (27.9)      | 0.029                |
| Age, years, mean (SD)                       | 63.4 (6.6)      | 66.6 (7.2)        | 0.470                |
| Self-reported health, good/very good, N (%) | 8,366(84.1)     | 6,177 (82.3)      | 0.049                |
| Hemoglobin, g/L, mean (SD)                  | 134.7 (13.3)    | 135.4 (12.8)      | 0.051                |
| Hematocrit, %, (SD)                         | 40.5 (3.2)      | 40.3 (3.4)        | 0.048                |
| <b>Socioeconomic position</b>               |                 |                   |                      |
| Education, N (%)                            |                 |                   |                      |
| ≤ Primary                                   | 3,372 (32.9)    | 3,592 (46.9)      | 0..257               |
| Middle school                               | 5,840(57.0)     | 3,449 (45.1)      |                      |
| ≥ College                                   | 1,027 (10.0)    | 614 (8.0)         |                      |
| Occupation, N (%)                           |                 |                   |                      |
| Manual                                      | 5,915 (58.2)    | 4,786 (62.8)      | 0.083                |
| Non-manual                                  | 2,587 (25.4)    | 1,791 (23.5)      |                      |
| Other                                       | 1,669 (16.4)    | 1,044 (13.7)      |                      |
| Family income, CNY/year, N (%)              |                 |                   |                      |
| ≤ 30,000                                    | 3,543 (34.6)    | 3,068 (40.1)      | 0.003                |
| > 30,000                                    | 4,647 (45.4)    | 2,616 (34.2)      |                      |
| Don't know                                  | 2,042 (20.0)    | 1,965 (25.7)      |                      |
| <b>Behavioral factors</b>                   |                 |                   |                      |
| Smoking status, N (%)                       |                 |                   |                      |
| Never                                       | 8,548 (83.5)    | 6,150 (80.4)      | 0.069                |
| Former                                      | 775 (7.6)       | 737 (9.6)         |                      |
| Current                                     | 909 (8.9)       | 766 (10.0)        |                      |
| Alcohol use, N (%)                          |                 |                   |                      |
| Never                                       | 7,041 (69.1)    | 5,671 (74.4)      | 0.123                |
| Former                                      | 342 (3.4)       | 269 (3.5)         |                      |
| Current                                     | 2,805 (27.5)    | 1,686 (22.1)      |                      |
| Physical activity, N (%)                    |                 |                   |                      |
| Inactive                                    | 878 (8.6)       | 569 (7.4)         | 0.008                |
| Minimally active                            | 3,964 (38.7)    | 3,176 (41.5)      |                      |
| Active                                      | 5,399 (52.7)    | 3,912 (51.1)      |                      |
| Tea intake, N (%)                           |                 |                   |                      |
| Never-drinkers                              | 1,040 (10.2)    | 920 (12.0)        | 0.007                |
| Occasional drinkers                         | 3,505 (34.2)    | 2,441 (31.9)      |                      |
| Former drinkers                             | 63 (0.6)        | 40 (0.5)          |                      |
| Regular drinkers                            | 5,633 (55.0)    | 4,256 (55.6)      |                      |

CNY = Chinese Yuan Renminbi (US\$1 = 7 CNY); SD = standard deviation.

\* Cohen classified effect sizes as small ( $d = 0.2$ ), medium ( $d = 0.5$ ), and large ( $d \geq 0.8$ ).

**Table S6. Baseline characteristics by participants who with (N = 5,303) and without re-assessments (5,132) during the third follow-up (2016–2019).**

|                                             | With (N= 5,303) | Without (N=5,132) | Cohen's effect size* |
|---------------------------------------------|-----------------|-------------------|----------------------|
| Sex, men, N (%)                             | 1,381 (26.0)    | 1,394 (27.2)      | 0.025                |
| Age, years, mean (SD)                       | 66.8 (6.5)      | 69.7 (7.2)        | 0.428                |
| Self-reported health, good/very good, N (%) | 4,345(84.3)     | 4,180 (84.0)      | 0.007                |
| Hemoglobin, g/L, mean (SD)                  | 133.2 (12.0)    | 132.7 (12.7)      | 0.041                |
| Hematocrit, %, (SD)                         | 40.0 (3.3)      | 40.1 (3.7)        | 0.025                |
| <b>Socioeconomic position</b>               |                 |                   |                      |
| Education, N (%)                            |                 |                   |                      |
| ≤ Primary                                   | 1,522 (28.7)    | 1,910 (37.2)      | 0.146                |
| Middle school                               | 3,234(61.0)     | 2,716 (52.9)      |                      |
| ≥ College                                   | 546 (10.3)      | 505 (9.8)         |                      |
| Occupation, N (%)                           |                 |                   |                      |
| Manual                                      | 3,031 (57.6)    | 2,993 (58.7)      | 0.023                |
| Non-manual                                  | 1,342 (25.5)    | 1,286 (25.2)      |                      |
| Other                                       | 890 (16.9)      | 821 (16.1)        |                      |
| Family income, CNY/year, N (%)              |                 |                   |                      |
| ≤ 30,000                                    | 1,798 (33.9)    | 1,806 (35.2)      | <0.001               |
| > 30,000                                    | 2,478 (46.8)    | 2,263 (44.1)      |                      |
| Don't know                                  | 1,023 (19.3)    | 1,058 (20.6)      |                      |
| <b>Behavioral factors</b>                   |                 |                   |                      |
| Smoking status, N (%)                       |                 |                   |                      |
| Never                                       | 4,458 (84.1)    | 4,254 (83.0)      | 0.024                |
| Former                                      | 383 (7.2)       | 405 (7.9)         |                      |
| Current                                     | 461 (8.7)       | 465 (9.1)         |                      |
| Alcohol use, N (%)                          |                 |                   |                      |
| Never                                       | 3,594 (68.1)    | 3,576 (70.0)      | 0.046                |
| Former                                      | 172 (3.3)       | 179 (3.5)         |                      |
| Current                                     | 1,510 (28.6)    | 1,351 (26.5)      |                      |
| Physical activity, N (%)                    |                 |                   |                      |
| Inactive                                    | 461 (8.7)       | 443 (8.6)         | 0.019                |
| Minimally active                            | 2,018 (38.1)    | 2,021 (39.4)      |                      |
| Active                                      | 2,824 (53.3)    | 2,668 (52.0)      |                      |
| Tea intake, N (%)                           |                 |                   |                      |
| Never-drinkers                              | 507 (9.6)       | 553 (10.8)        | 0.011                |
| Occasional drinkers                         | 1,877 (35.4)    | 1,691 (33.0)      |                      |
| Former drinkers                             | 35 (0.7)        | 31 (0.6)          |                      |
| Regular drinkers                            | 2,884 (54.4)    | 2,857 (55.7)      |                      |

CNY = Chinese Yuan Renminbi (US\$1 = 7 CNY); SD = standard deviation.



\* Cohen classified effect sizes as small ( $d = 0.2$ ), medium ( $d = 0.5$ ), and large ( $d \geq 0.8$ ).

**Table S7. The detailed information on the tea intake instrumental variables used in the two-sample Mendelian randomization.**

|    | SNP         | CHR | Othe<br>r<br>allele | Effec<br>t<br>allele | $\beta$ | Standard<br>error | P         | F statistic | Potential<br>pleiotropy                            |
|----|-------------|-----|---------------------|----------------------|---------|-------------------|-----------|-------------|----------------------------------------------------|
| 1  | rs10741694  | 11  | C                   | T                    | 0.015   | 0.0022            | 7.90E-12  | 46.7845     |                                                    |
| 2  | rs10752269  | 10  | A                   | G                    | -0.0129 | 0.0021            | 1.30E-09  | 36.8782     | Qualifications:<br>college or<br>university degree |
| 3  | rs10764990  | 10  | A                   | G                    | -0.0122 | 0.0022            | 1.90E-08  | 31.5892     |                                                    |
| 4  | rs1156588   | 2   | G                   | A                    | -0.0155 | 0.0026            | 2.90E-09  | 35.2411     |                                                    |
| 5  | rs11587444  | 1   | G                   | A                    | 0.0140  | 0.0022            | 1.00E-10  | 41.7885     |                                                    |
| 6  | rs12591786  | 15  | T                   | C                    | -0.0184 | 0.0029            | 3.70E-10  | 39.274      |                                                    |
| 7  | rs13282783  | 8   | T                   | C                    | -0.0136 | 0.0024            | 7.90E-09  | 33.2893     |                                                    |
| 8  | rs141071726 | 7   | A                   | G                    | 0.0407  | 0.0068            | 2.20E-09  | 35.7536     |                                                    |
| 9  | rs1481012   | 4   | G                   | A                    | -0.0262 | 0.0034            | 5.30E-15  | 61.1475     |                                                    |
| 10 | rs149805207 | 6   | G                   | A                    | -0.0719 | 0.0126            | 1.10E-08  | 32.6847     |                                                    |
| 11 | rs17245213  | 11  | A                   | G                    | -0.0146 | 0.0026            | 2.00E-08  | 31.5208     |                                                    |
| 12 | rs17576658  | 13  | A                   | G                    | -0.0135 | 0.0025            | 4.10E-08  | 30.1166     |                                                    |
| 13 | rs17685     | 7   | A                   | G                    | 0.0231  | 0.0024            | 1.60E-22  | 95.364      |                                                    |
| 14 | rs2117137   | 3   | G                   | A                    | 0.0130  | 0.0022            | 1.70E-09  | 36.3381     |                                                    |
| 15 | rs2279844   | 17  | A                   | G                    | -0.012  | 0.0022            | 4.00E-08  | 30.1514     |                                                    |
| 16 | rs2351187   | 10  | A                   | G                    | 0.0129  | 0.0023            | 1.60E-08  | 31.9587     |                                                    |
| 17 | rs2472297   | 15  | T                   | C                    | 0.0533  | 0.0024            | 2.30E-109 | 493.6456    |                                                    |
| 18 | rs2478875   | 6   | G                   | A                    | 0.0219  | 0.0026            | 5.10E-17  | 70.2994     |                                                    |
| 19 | rs2645929   | 13  | G                   | A                    | -0.015  | 0.0027            | 3.50E-08  | 30.4240     |                                                    |
| 20 | rs34619     | 5   | A                   | G                    | 0.0117  | 0.0021            | 4.30E-08  | 30.0212     | Years of<br>educational<br>attainment              |
| 21 | rs4410790   | 7   | C                   | T                    | 0.0406  | 0.0022            | 3.40E-76  | 341.2698    |                                                    |
| 22 | rs4808193   | 19  | C                   | T                    | 0.0151  | 0.0022            | 1.70E-11  | 45.2405     |                                                    |
| 23 | rs4817505   | 21  | C                   | T                    | 0.0151  | 0.0022            | 4.20E-12  | 48.0123     |                                                    |
| 24 | rs56188862  | 1   | C                   | T                    | -0.0158 | 0.0022            | 4.30E-13  | 52.4973     |                                                    |
| 25 | rs57462170  | 3   | A                   | G                    | 0.0192  | 0.0034            | 1.90E-08  | 31.6203     |                                                    |
| 26 | rs57631352  | 19  | G                   | A                    | -0.0131 | 0.0023            | 1.70E-08  | 31.8684     |                                                    |
| 27 | rs6829      | 13  | T                   | C                    | -0.0119 | 0.0022            | 3.70E-08  | 30.2819     |                                                    |
| 28 | rs72797284  | 5   | G                   | A                    | -0.0171 | 0.0024            | 7.00E-13  | 51.5582     | Qualifications:<br>college or<br>university degree |
| 29 | rs7757102   | 6   | G                   | A                    | -0.0118 | 0.0021            | 3.10E-08  | 30.6239     |                                                    |
| 30 | rs9624470   | 22  | A                   | G                    | 0.0252  | 0.0022            | 1.30E-31  | 136.8396    |                                                    |
| 31 | rs9648476   | 7   | A                   | G                    | 0.0125  | 0.0022            | 1.10E-08  | 32.7221     |                                                    |
| 32 | rs977474    | 12  | T                   | C                    | 0.0218  | 0.0029            | 2.40E-14  | 58.1803     |                                                    |
| 33 | rs9937354   | 16  | A                   | G                    | -0.0141 | 0.0021            | 4.90E-11  | 43.2313     |                                                    |

|    |            |    |   |   |         |        |          |         |                                                    |
|----|------------|----|---|---|---------|--------|----------|---------|----------------------------------------------------|
| 34 | rs11164870 | 1  | C | G | -0.012  | 0.0022 | 4.20E-08 | 30.0369 | Qualifications:<br>college or<br>university degree |
| 35 | rs132904   | 22 | G | C | 0.0166  | 0.0026 | 7.80E-11 | 42.2958 |                                                    |
| 36 | rs1453548  | 11 | T | A | -0.0133 | 0.0022 | 3.00E-09 | 35.1675 |                                                    |
| 37 | rs2273447  | 20 | A | T | 0.0175  | 0.0026 | 3.30E-11 | 43.9906 |                                                    |
| 38 | rs2783129  | 13 | C | G | -0.0117 | 0.0021 | 3.80E-08 | 30.2543 |                                                    |
| 39 | rs56348300 | 9  | C | G | 0.0159  | 0.0027 | 6.10E-09 | 33.7987 |                                                    |
| 40 | rs713598   | 7  | C | G | 0.0134  | 0.0022 | 5.20E-10 | 38.5899 |                                                    |
| 41 | rs9302428  | 16 | C | G | 0.0122  | 0.0022 | 2.60E-08 | 30.9486 | Qualifications:<br>college or<br>university degree |

---

SNP: single-nucleotide polymorphisms.

**Table S8. Detailed information on the instrumental variables for green tea intake and herbal tea intake used in the two-sample Mendelian randomization.**

|                          | SNP         | CHR | Othe<br>r<br>allele | Effec<br>t<br>allele | Effect<br>allele<br>freque<br>ncy | $\beta$ | Standa<br>rd<br>error | P        | F<br>statistic |
|--------------------------|-------------|-----|---------------------|----------------------|-----------------------------------|---------|-----------------------|----------|----------------|
| <b>Green tea intake</b>  |             |     |                     |                      |                                   |         |                       |          |                |
| 1                        | rs12144868  | 1   | T                   | C                    | 0.0151                            | 3.0727  | 0.5275                | 5.70E-09 | 33.9363        |
| 2                        | rs142811251 | 2   | G                   | C                    | 0.0103                            | 3.4598  | 0.6178                | 2.10E-08 | 31.3600        |
| 3                        | rs145313301 | 2   | G                   | C                    | 0.0061                            | 4.9937  | 0.8125                | 7.90E-10 | 37.7737        |
| 4                        | rs144954030 | 2   | T                   | C                    | 0.0057                            | 4.8802  | 0.8211                | 2.80E-09 | 35.3273        |
| 5                        | rs115952340 | 3   | G                   | A                    | 0.0133                            | 3.0097  | 0.5503                | 4.50E-08 | 29.9162        |
| 6                        | rs78547201  | 5   | C                   | G                    | 0.0116                            | 3.2750  | 0.5777                | 1.40E-08 | 32.1332        |
| 7                        | rs79774709  | 6   | C                   | T                    | 0.0058                            | 5.1406  | 0.8538                | 1.70E-09 | 36.2513        |
| 8                        | rs116985617 | 6   | C                   | T                    | 0.0085                            | 3.8927  | 0.6744                | 7.80E-09 | 33.3157        |
| 9                        | rs189140232 | 7   | G                   | A                    | 0.0100                            | 3.5608  | 0.6257                | 1.30E-08 | 32.3919        |
| 10                       | rs11976995  | 7   | T                   | G                    | 0.0304                            | 2.0194  | 0.3487                | 7.00E-09 | 33.5411        |
| 11                       | rs116035596 | 9   | C                   | T                    | 0.0066                            | 4.9036  | 0.7429                | 4.10E-11 | 43.5698        |
| 12                       | rs79638269  | 10  | C                   | T                    | 0.0163                            | 2.6764  | 0.4729                | 1.50E-08 | 32.0300        |
| 13                       | rs644205    | 10  | G                   | A                    | 0.1965                            | 0.8489  | 0.1508                | 1.80E-08 | 31.7057        |
| 14                       | rs183788045 | 11  | G                   | T                    | 0.0087                            | 3.5482  | 0.6498                | 4.70E-08 | 29.8187        |
| 15                       | rs117251267 | 13  | T                   | C                    | 0.0116                            | 3.5501  | 0.6178                | 9.10E-09 | 33.0254        |
| 16                       | rs142373582 | 14  | T                   | C                    | 0.0142                            | 3.2463  | 0.5658                | 9.60E-09 | 32.9244        |
| 17                       | rs113898417 | 16  | C                   | G                    | 0.0070                            | 3.9789  | 0.7266                | 4.40E-08 | 29.9850        |
| 18                       | rs62059726  | 17  | G                   | A                    | 0.0152                            | 2.8216  | 0.5118                | 3.50E-08 | 30.3925        |
| 19                       | rs12958992  | 18  | A                   | G                    | 0.0269                            | 2.1609  | 0.3789                | 1.20E-08 | 32.5250        |
| 20                       | rs117077082 | 20  | A                   | G                    | 0.0318                            | 1.9206  | 0.3422                | 2.00E-08 | 31.5041        |
| 21                       | rs113322644 | 21  | C                   | A                    | 0.0117                            | 3.2096  | 0.5551                | 7.40E-09 | 33.4352        |
| <b>Herbal tea intake</b> |             |     |                     |                      |                                   |         |                       |          |                |
| 1                        | rs141595975 | 1   | T                   | C                    | 0.0097                            | 4.2359  | 0.6691                | 2.40E-10 | 40.0830        |
| 2                        | rs145853157 | 1   | A                   | T                    | 0.0081                            | 3.9211  | 0.6721                | 5.40E-09 | 34.0349        |
| 3                        | rs142141377 | 1   | A                   | C                    | 0.0061                            | 4.9595  | 0.7972                | 4.90E-10 | 38.6983        |
| 4                        | rs114605739 | 4   | A                   | G                    | 0.0109                            | 3.2706  | 0.5846                | 2.20E-08 | 31.3002        |
| 5                        | rs1796468   | 4   | C                   | T                    | 0.0078                            | 4.1480  | 0.7077                | 4.60E-09 | 34.3537        |
| 6                        | rs79840793  | 4   | C                   | T                    | 0.0114                            | 3.2899  | 0.5714                | 8.50E-09 | 33.1514        |
| 7                        | rs148443638 | 6   | G                   | A                    | 0.0098                            | 3.8450  | 0.6183                | 5.00E-10 | 38.6778        |
| 8                        | rs73118299  | 7   | A                   | G                    | 0.0077                            | 4.3053  | 0.7444                | 7.30E-09 | 33.4522        |
| 9                        | rs9792217   | 8   | C                   | T                    | 0.0140                            | 2.9309  | 0.5022                | 5.40E-09 | 34.0568        |
| 10                       | rs146680299 | 8   | C                   | T                    | 0.0142                            | 2.8700  | 0.5160                | 2.70E-08 | 30.9369        |
| 11                       | rs146747894 | 8   | G                   | A                    | 0.0105                            | 3.4236  | 0.5970                | 9.80E-09 | 32.8843        |
| 12                       | rs79519615  | 10  | T                   | C                    | 0.0099                            | 3.4516  | 0.6002                | 8.90E-09 | 33.0682        |
| 13                       | rs57042533  | 11  | G                   | T                    | 0.0054                            | 4.5911  | 0.8235                | 2.50E-08 | 31.0784        |
| 14                       | rs148342659 | 11  | C                   | T                    | 0.0068                            | 4.2438  | 0.7483                | 1.40E-08 | 32.1601        |
| 15                       | rs79919614  | 12  | A                   | T                    | 0.0204                            | 2.5317  | 0.4230                | 2.20E-09 | 35.8208        |

|    |             |    |   |   |        |        |        |          |         |
|----|-------------|----|---|---|--------|--------|--------|----------|---------|
| 16 | rs112423877 | 14 | T | A | 0.0070 | 4.0508 | 0.7337 | 3.40E-08 | 30.4802 |
| 17 | rs141436163 | 18 | G | T | 0.0186 | 2.4968 | 0.4430 | 1.70E-08 | 31.7650 |
| 18 | rs77677063  | 18 | C | T | 0.0099 | 3.5350 | 0.6326 | 2.30E-08 | 31.2242 |
| 19 | rs188433347 | 18 | T | G | 0.0087 | 3.6337 | 0.6554 | 3.00E-08 | 30.7343 |

---

SNP: single-nucleotide polymorphisms.

**Table S9. Detailed information on the instrumental variables for tea consumption in East Asians used in the two-sample Mendelian randomization.**

|    | SNP        | CHR | Other allele | Effect allele | Effect allele frequency | $\beta$ | Standard error | P        | F statistic |
|----|------------|-----|--------------|---------------|-------------------------|---------|----------------|----------|-------------|
| 1  | rs62257549 | 3   | A            | G             | 0.8184                  | -0.0588 | 0.0116         | 6.59E-07 | 25.8531     |
| 2  | rs9390773  | 6   | T            | G             | 0.7190                  | -0.0523 | 0.0107         | 1.87E-06 | 23.7971     |
| 3  | rs17151746 | 7   | A            | G             | 0.8252                  | 0.0556  | 0.0118         | 4.27E-06 | 22.0995     |
| 4  | rs7827019  | 8   | T            | C             | 0.8378                  | 0.0641  | 0.0134         | 3.00E-06 | 22.7648     |
| 5  | rs13295221 | 9   | T            | A             | 0.9164                  | -0.0761 | 0.0157         | 2.03E-06 | 23.5811     |
| 6  | rs10500924 | 11  | C            | G             | 0.9641                  | 0.1145  | 0.0232         | 1.43E-06 | 24.2797     |
| 7  | rs7137708  | 12  | G            | A             | 0.8986                  | -0.0800 | 0.0167         | 2.68E-06 | 23.0728     |
| 8  | rs79105258 | 12  | A            | C             | 0.7468                  | -0.1169 | 0.0109         | 6.67E-26 | 115.7316    |
| 9  | rs35640546 | 15  | C            | T             | 0.7715                  | 0.0494  | 0.0105         | 3.80E-06 | 22.3476     |
| 10 | rs8031448  | 15  | C            | T             | 0.5858                  | 0.0427  | 0.0088         | 2.36E-06 | 23.2624     |

SNP: single-nucleotide polymorphisms.

**Table S10. Mendelian randomization associations of tea intake with anemia, hemoglobin, and hematocrit after excluding potential pleiotropic SNPs.**

| Exposure                                | Outcome                                                      | SNPs            | F<br>statistic | Methods  | OR (95% CI)         | P    | IVW                                        | MR-Egger      |
|-----------------------------------------|--------------------------------------------------------------|-----------------|----------------|----------|---------------------|------|--------------------------------------------|---------------|
|                                         |                                                              |                 |                |          |                     |      | Cochran's Q<br>statistic (I <sup>2</sup> ) | Intercept (P) |
| Tea intake (cups/day)<br>(IEU OpenGWAS) | Anemia (Ref.: no<br>anemia) (FinnGen)                        | 30 <sup>a</sup> | 69.66          | IVW      | 1.15 (0.80, 1.64)   | 0.45 | 62.19<br>(53.4%)                           | -0.010 (0.19) |
|                                         |                                                              |                 |                | WM       | 1.50 (1.02, 2.20)   | 0.04 |                                            |               |
|                                         |                                                              |                 |                | MR-Egger | 1.79 (0.86, 3.74)   | 0.13 |                                            |               |
|                                         |                                                              |                 |                | MRPRESSO | 1.24 (0.89, 1.72)   | 0.22 |                                            |               |
|                                         |                                                              |                 |                |          | <b>β (95% CI)</b>   |      |                                            |               |
| Tea intake (cups/day)<br>(IEU OpenGWAS) | Hemoglobin (g/dL)<br>(INTERVAL, UK<br>Biobank, UK<br>BiLEVE) | 30 <sup>a</sup> | 69.66          | IVW      | -0.02 (-0.12, 0.08) | 0.98 | 52.72<br>(45.0%)                           | <0.001 (0.90) |
|                                         |                                                              |                 |                | WM       | -0.06 (-0.17, 0.05) | 0.93 |                                            |               |
|                                         |                                                              |                 |                | MR-Egger | -0.01 (-0.22, 0.20) | 0.99 |                                            |               |
|                                         |                                                              |                 |                | MRPRESSO | -0.04 (-0.13, 0.05) | 0.42 |                                            |               |
| Tea intake (cups/day)<br>(IEU OpenGWAS) | Hematocrit (%)<br>(INTERVAL, UK<br>Biobank, UK<br>BiLEVE)    | 30 <sup>a</sup> | 69.66          | IVW      | 0.00 (-0.11, 0.10)  | 0.94 | 61.42<br>(52.8%)                           | <0.001 (0.90) |
|                                         |                                                              |                 |                | WM       | -0.05 (-0.16, 0.06) | 0.35 |                                            |               |
|                                         |                                                              |                 |                | MR-Egger | -0.02 (-0.24, 0.21) | 0.88 |                                            |               |
|                                         |                                                              |                 |                | MRPRESSO | -0.02 (-0.12, 0.07) | 0.62 |                                            |               |
| Tea intake (cups/day)<br>(IEU OpenGWAS) | Hemoglobin (g/L)<br>(the UK Household<br>Longitudinal Study) | 10 <sup>b</sup> | 78.85          | IVW      | 0.47 (-0.14, 1.08)  | 0.13 | 4.41 (0.0%)                                | 0.009 (0.59)  |
|                                         |                                                              |                 |                | WM       | 0.70 (-0.11, 1.51)  | 0.09 |                                            |               |
|                                         |                                                              |                 |                | MR-Egger | 0.09 (-1.35, 1.54)  | 0.90 |                                            |               |
|                                         |                                                              |                 |                | MRPRESSO | 0.47 (0.04, 0.90)   | 0.06 |                                            |               |
| Tea intake (cups/day)<br>(IEU OpenGWAS) | Hematocrit (%)<br>(BioVU)                                    | 21 <sup>c</sup> | 80.57          | IVW      | 0.00 (-0.13, 0.13)  | 0.97 | 25.30<br>(20.9%)                           | <0.001 (0.98) |
|                                         |                                                              |                 |                | WM       | 0.03 (-0.13, 0.20)  | 0.67 |                                            |               |
|                                         |                                                              |                 |                | MR-Egger | 0.00 (-0.27, 0.27)  | 0.99 |                                            |               |
|                                         |                                                              |                 |                | MRPRESSO | 0.00 (-0.13, 0.13)  | 0.97 |                                            |               |

OR: odds ratio; CI: confidence interval. IVW: inverse-variance weighted; WM: weighted median method; MRPRESSO: Mendelian randomization pleiotropy residual sum and outlier; SNP: single-nucleotide polymorphisms; BioVU: the Vanderbilt University biobank.

<sup>a</sup> 3 SNPs were removed from the remaining instrumental variables when anemia (FinnGen), hemoglobin (INTERVAL, UK Biobank, UK BiLEVE), and hematocrit (INTERVAL, UK Biobank, UK BiLEVE) were outcomes: rs34619, rs72797284, rs10752269.

<sup>b</sup> 1 SNP was removed from the remaining instrumental variables when hemoglobin (The UK Household Longitudinal Study) was outcome: rs72797284.

<sup>c</sup> 2 SNPs were removed from the remaining instrumental variables when hematocrit (BioVU) was outcome: rs72797284, rs34619.



**Table S11. Mendelian randomization associations of green tea intake and herbal tea intake with anemia, hemoglobin, and hematocrit.**

| Exposure                                     | Outcome                                             | SNPs | F statistic | Methods  | OR (95% CI)            | P    | IVW                                     | MR-Egger      |
|----------------------------------------------|-----------------------------------------------------|------|-------------|----------|------------------------|------|-----------------------------------------|---------------|
|                                              |                                                     |      |             |          |                        |      | Cochran's Q statistic (I <sup>2</sup> ) | Intercept (P) |
| Green tea intake (cups/day) (IEU OpenGWAS)   | Anemia (Ref.: no anemia) (FinnGen)                  | 20   | 33.15       | IVW      | 1.00 (0.99, 1.01)      | 0.90 | 17.24 (0.0%)                            | -0.007 (0.69) |
|                                              |                                                     |      |             | WM       | 1.00 (0.99, 1.01)      | 0.36 |                                         |               |
|                                              |                                                     |      |             | MR-Egger | 1.00 (0.99, 1.02)      | 0.78 |                                         |               |
|                                              |                                                     |      |             | MRPRESSO | 1.00 (0.99, 1.01)      | 0.89 |                                         |               |
| Herbal tea intake (cups/day) (IEU OpenGWAS)  | Anemia (Ref.: no anemia) (FinnGen)                  | 19   | 33.58       | IVW      | 1.00 (0.99, 1.01)      | 1.00 | 17.85 (0.0%)                            | 0.086 (0.13)  |
|                                              |                                                     |      |             | WM       | 1.00 (0.99, 1.01)      | 0.97 |                                         |               |
|                                              |                                                     |      |             | MR-Egger | 0.98 (0.95, 1.01)      | 0.14 |                                         |               |
|                                              |                                                     |      |             | MRPRESSO | 1.00 (0.99, 1.01)      | 1.00 |                                         |               |
| <b>β (95% CI)</b>                            |                                                     |      |             |          |                        |      |                                         |               |
| Green tea intake (cups/day) (IEU OpenGWAS)   | Hemoglobin (g/dL) (INTERVAL, UK Biobank, UK BiLEVE) | 21   | 33.18       | IVW      | 0.001 (-0.002, 0.003)  | 0.66 | 22.48 (11.0%)                           | -0.012 (0.04) |
|                                              |                                                     |      |             | WM       | 0.001 (-0.002, 0.004)  | 0.57 |                                         |               |
|                                              |                                                     |      |             | MR-Egger | 0.005 (0.000, 0.009)   | 0.05 |                                         |               |
|                                              |                                                     |      |             | MRPRESSO | 0.001 (-0.002, 0.003)  | 0.67 |                                         |               |
| Green tea intake (cups/day) (IEU OpenGWAS)   | Hematocrit (%) (INTERVAL, UK Biobank, UK BiLEVE)    | 21   | 33.18       | IVW      | 0.001 (-0.002, 0.003)  | 0.69 | 24.87 (19.6%)                           | -0.013 (0.03) |
|                                              |                                                     |      |             | WM       | 0.001 (-0.003, 0.004)  | 0.72 |                                         |               |
|                                              |                                                     |      |             | MR-Egger | 0.005 (0.001, 0.010)   | 0.03 |                                         |               |
|                                              |                                                     |      |             | MRPRESSO | 0.001 (-0.002, 0.003)  | 0.70 |                                         |               |
| Herbal tea intake (cups/day) (IEU OpenGWAS)  | Hemoglobin (g/dL) (INTERVAL, UK Biobank, UK BiLEVE) | 19   | 33.58       | IVW      | 0.000 (-0.002, 0.002)  | 0.90 | 17.63 (0.0%)                            | -0.022 (0.33) |
|                                              |                                                     |      |             | WM       | 0.000 (-0.003, 0.003)  | 0.88 |                                         |               |
|                                              |                                                     |      |             | MR-Egger | 0.006 (-0.006, 0.018)  | 0.35 |                                         |               |
|                                              |                                                     |      |             | MRPRESSO | 0.000 (-0.002, 0.002)  | 0.90 |                                         |               |
| Herbal tea intake (cups/day) (IEU Open GWAS) | Hemoglobin (g/dL) (INTERVAL, UK Biobank, UK)        | 19   | 33.58       | IVW      | 0.000 (-0.003, 0.002)  | 0.82 | 11.34 (0.0%)                            | -0.018 (0.41) |
|                                              |                                                     |      |             | WM       | -0.001 (-0.004, 0.002) | 0.71 |                                         |               |
|                                              |                                                     |      |             | MR-Egger | 0.005 (-0.007, 0.017)  | 0.44 |                                         |               |

---

|         |          |                       |      |
|---------|----------|-----------------------|------|
| BiLEVE) | MRPRESSO | 0.000 (-0.002, 0.002) | 0.78 |
|---------|----------|-----------------------|------|

---

OR: odds ratio; CI: confidence interval. IVW: inverse-variance weighted; WM: weighted median method; MRPRESSO: Mendelian randomization pleiotropy residual sum and outlier; SNP: single-nucleotide polymorphisms; BioVU: the Vanderbilt University biobank.

**Table S12. Mendelian randomization associations of tea intake with iron deficiency anemia, hemoglobin, and hematocrit in East Asians.**

| Exposure                                                    | Outcome                                                                              | SNPs | F statistic | Methods  | OR (95% CI)         | P    | IVW                                     | MR-Egger      |
|-------------------------------------------------------------|--------------------------------------------------------------------------------------|------|-------------|----------|---------------------|------|-----------------------------------------|---------------|
|                                                             |                                                                                      |      |             |          |                     |      | Cochran's Q statistic (I <sup>2</sup> ) | Intercept (P) |
| Green tea consumption (categorical ordered) (Biobank Japan) | Iron deficiency anemia (Ref: no iron deficiency anemia) (The China Kadoorie Biobank) | 10   | 32.68       | IVW      | 2.49 (0.49, 12.66)  | 0.27 | 11.61 (22.5%)                           | 0.058 (0.76)  |
|                                                             |                                                                                      |      |             | WM       | 2.65 (0.37, 19.03)  | 0.33 |                                         |               |
|                                                             |                                                                                      |      |             | MR-Egger | 1.15 (0.01, 181.00) | 0.96 |                                         |               |
|                                                             |                                                                                      |      |             | MRPRESSO | 2.49 (0.49, 12.66)  | 0.30 |                                         |               |
|                                                             |                                                                                      |      |             |          | <b>β (95% CI)</b>   |      |                                         |               |
| Green tea consumption (Categorical Ordered) (Biobank Japan) | Hemoglobin (g/dL) (Korean Genome and Epidemiology Study)                             | 10   | 32.68       | IVW      | 0.02 (-0.04, 0.08)  | 0.47 | 14.14 (36.4%)                           | 0.003 (0.67)  |
|                                                             |                                                                                      |      |             | WM       | 0.04 (-0.03, 0.11)  | 0.22 |                                         |               |
|                                                             |                                                                                      |      |             | MR-Egger | -0.02 (-0.21, 0.17) | 0.85 |                                         |               |
|                                                             |                                                                                      |      |             | MRPRESSO | 0.02 (-0.04, 0.08)  | 0.49 |                                         |               |
| Green tea consumption (Biobank Japan)                       | Hematocrit (%) (Korean Genome and Epidemiology Study)                                | 10   | 32.68       | IVW      | 0.05 (-0.04, 0.14)  | 0.30 | 23.70 (62.0%)                           | -0.008 (0.44) |
|                                                             |                                                                                      |      |             | WM       | 0.09 (0.00, 0.18)   | 0.05 |                                         |               |
|                                                             |                                                                                      |      |             | MR-Egger | 0.15 (-0.12, 0.43)  | 0.30 |                                         |               |
|                                                             |                                                                                      |      |             | MRPRESSO | 0.02 (-0.06, 0.10)  | 0.63 |                                         |               |

OR: odds ratio; CI: confidence interval. IVW: inverse-variance weighted; WM: weighted median method; MRPRESSO: Mendelian randomization pleiotropy residual sum and outlier; SNP: single-nucleotide polymorphisms.

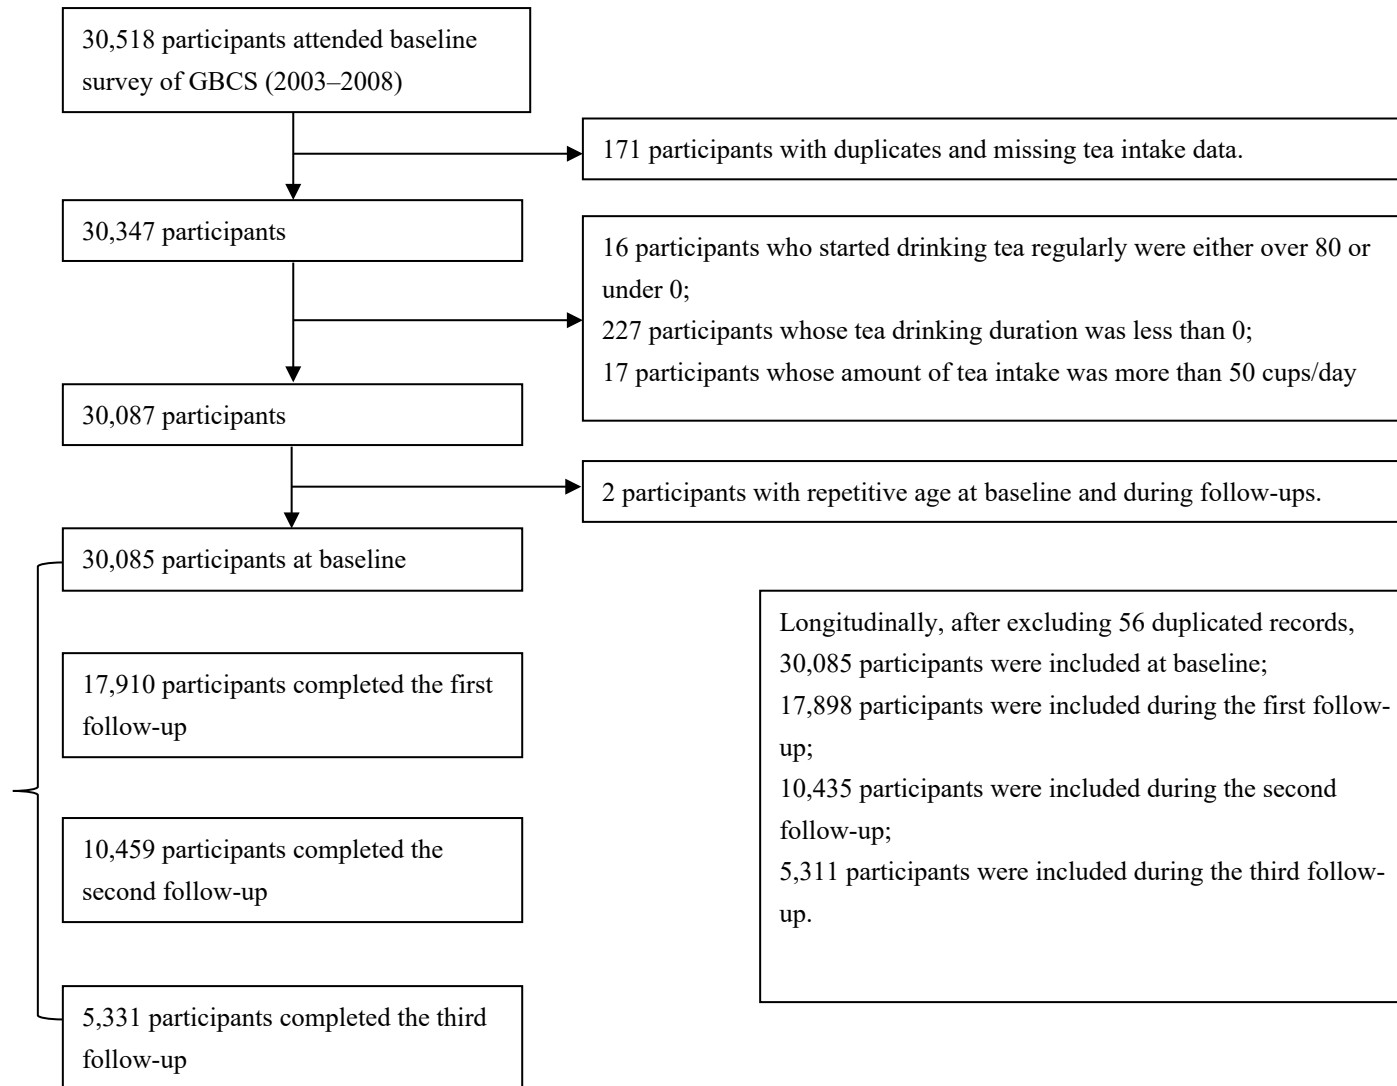

**Figure S1. Flow chart of GBCS participants.**

GBCS: Guangzhou Biobank Cohort Study.

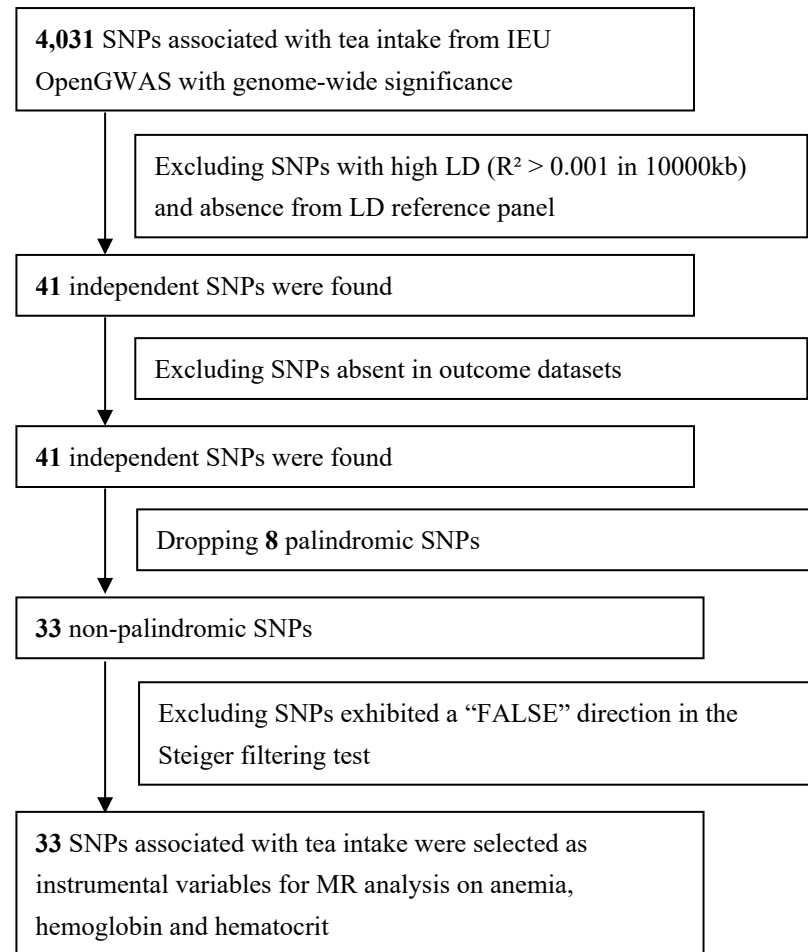

**Figure S2. Flow chart about how to select instrumental variables associated with tea intake in main analysis.**

SNP: single-nucleotide polymorphisms; LD: linkage disequilibrium; MR: Mendelian randomization; GWAS: genome-wide association study.

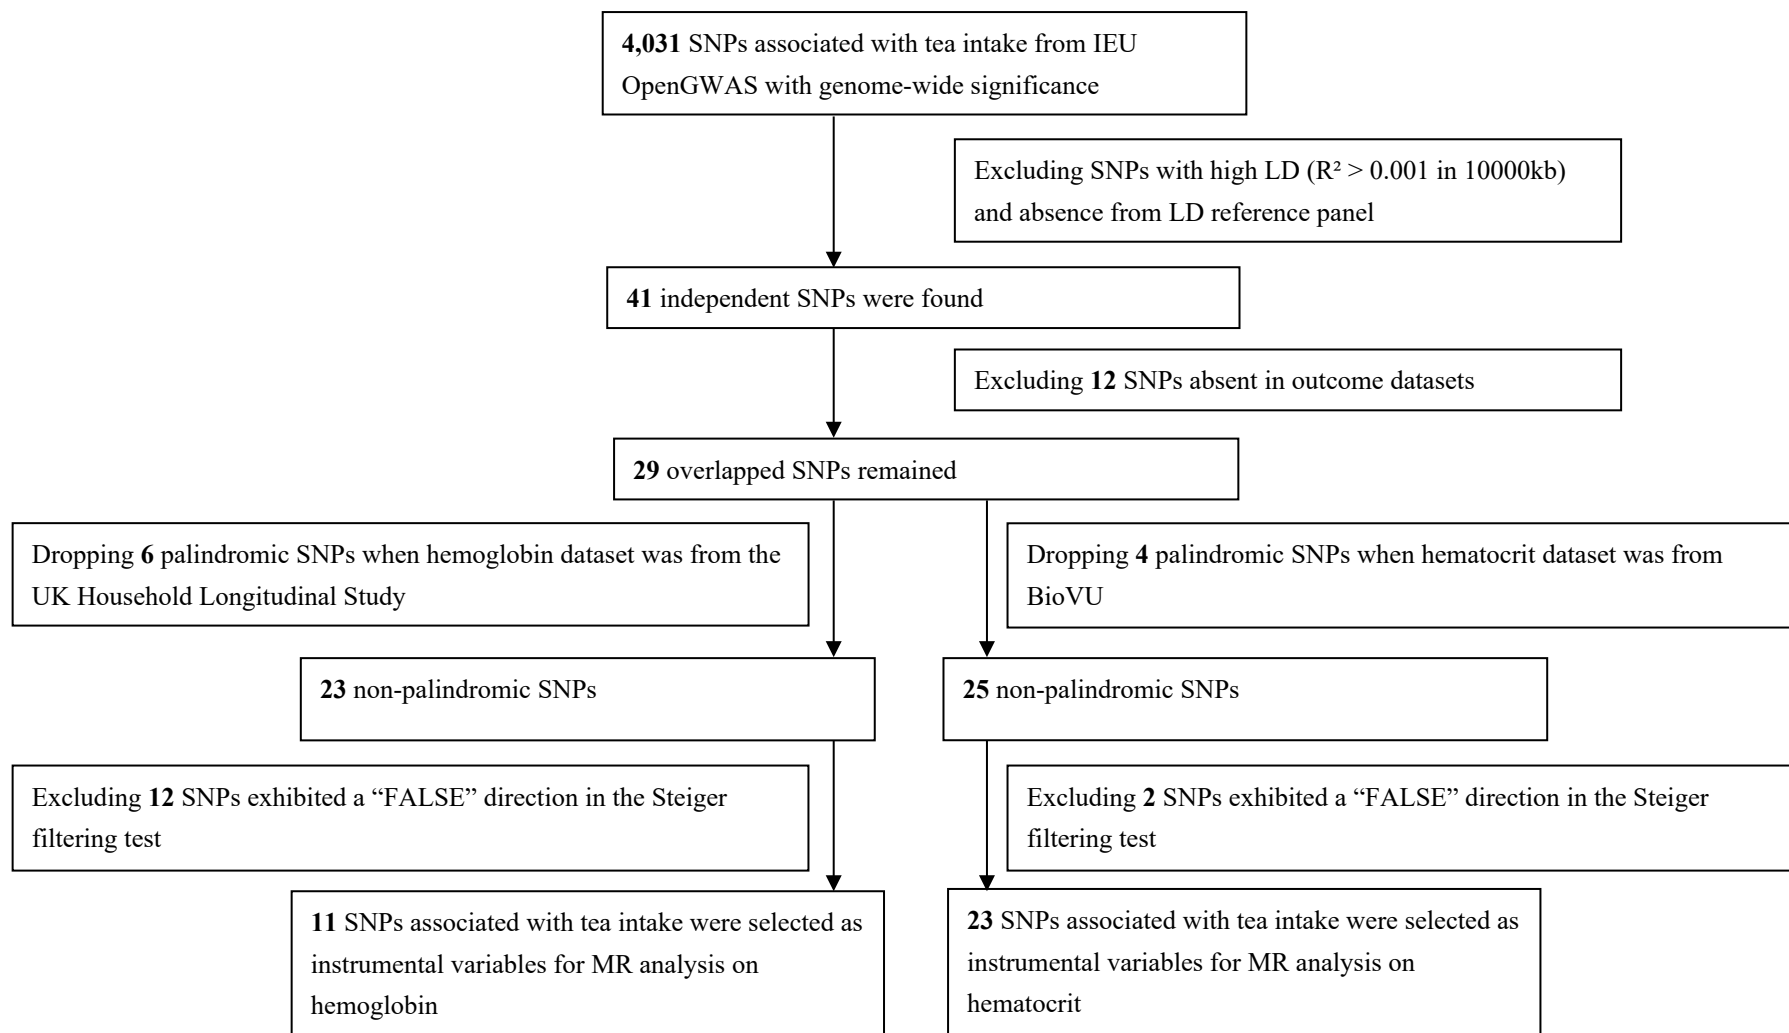

**Figure S3. Flow chart about how to select instrumental variables associated with tea intake in sensitive analysis.**

SNP: single-nucleotide polymorphisms; LD: linkage disequilibrium; MR: Mendelian randomization; GWAS: genome-wide association study; BioVU: the Vanderbilt University biobank.

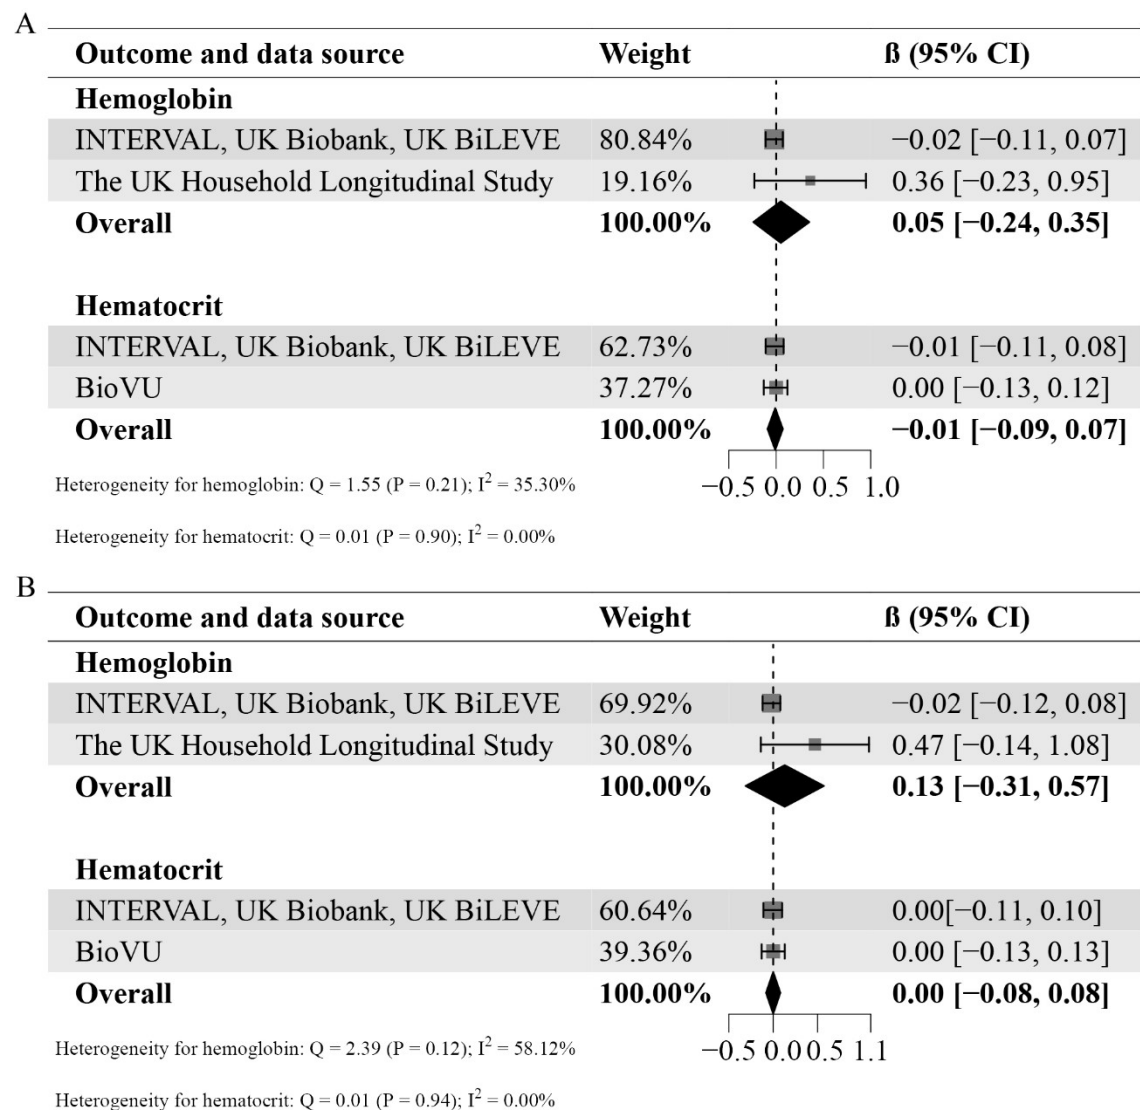

**Figure S4: Meta-analysis of inverse-variance weighted results for hemoglobin and hematocrit as outcomes in the main analysis (A) and sensitive analysis after excluding potential pleiotropic SNPs (B).**

CI: confidence interval; SNP: single-nucleotide polymorphisms; BioVU: the Vanderbilt University biobank.
